# Supplementary material for: Recent Advances in Biosensors for Diagnosis of Autoimmune Diseases
Source: MDPI journal article supplement (doi:10.3390/s24051510), 2024-02-26
Supplement: s1 [file s1]

Review

# Recent Advances in Biosensors for Diagnosis of Autoimmune Diseases

Ahlem Teniou <sup>1</sup>, Amina Rhouti <sup>1</sup> and Jean-Louis Marty <sup>2,\*</sup>

<sup>1</sup> Bioengineering Laboratory, Higher National School of Biotechnology, Constantine 25100, Algeria

<sup>2</sup> UFR Sciences, Université de Perpignan Via Domitia, 66860 Perpignan, France

\* Correspondence: jlmarty@univ-perp.fr (J.-L.M.)

## Supplementary Material

**Citation:** Teniou, A.; Rhouti, A.; Marty, J.-L. Recent Advances in Biosensors for Diagnosis of Autoimmune Diseases. *Sensors* **2024**, *24*, x. <https://doi.org/10.3390/xxxxx>

Academic Editor(s): Name

Received: date

Revised: date

Accepted: date

Published: date

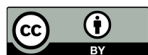

**Copyright:** © 2024 by the authors. Submitted for possible open access publication under the terms and conditions of the Creative Commons Attribution (CC BY) license (<https://creativecommons.org/licenses/by/4.0/>).

**Table S1:** Comparison between the reported biosensor technologies for the diagnosis and monitoring of autoimmune diseases.

15  
16  
17

| Method of detection                           | Target                                   | Limit of detection                               | Linear range                                   | Real samples            | Refs |
|-----------------------------------------------|------------------------------------------|--------------------------------------------------|------------------------------------------------|-------------------------|------|
| <b>Celiac disease</b>                         |                                          |                                                  |                                                |                         |      |
| Electrochemical (CV)                          | TGA                                      | 1.8 ng/mL                                        | 0.005 - 1 µg/mL                                | Serum                   | [1]  |
| Electrochemical (LSV)                         | TGA                                      | 260 ng/mL                                        | 0.26 - 6.9 µg/mL                               | Serum                   | [2]  |
| Electrochemical (SWV)                         | DGPA                                     | /                                                | 0.033 - 1.0 µg/mL                              | Serum                   | [3]  |
| Electrochemical (CV)                          | TGA                                      | 0.72 U/mL                                        | 0.25 - 8.54 U/mL                               | Serum                   | [4]  |
| Electrochemical (Chronoamperometry)           | TGA IgA                                  | 4.6 U/mL                                         | 0 - 100 U/mL                                   | Artificial human plasma | [5]  |
| Electrochemical (DPV)                         | TGA                                      | 2.4 U/mL                                         | 3 - 100 U/mL                                   | serum                   | [6]  |
| Electrochemical (EIS)                         | AGA                                      | 46 ng/mL                                         | 0 - 1 µg/mL                                    | Serum                   | [7]  |
| Electrochemical (Amperometry) + Optical (SPR) | AGA                                      | 33 ng/mL                                         | 0 - 10 µg/mL                                   | Serum                   | [8]  |
| Piezoelectric (QCM)                           | TGA                                      | 1300 ng/mL                                       | 1300 -12,000 ng/mL                             | Serum                   | [9]  |
| Electrochemical (CV)                          | TGA IgA<br>TGA IgG<br>AGA IgA<br>AGA IgG | 2.45 U/mL<br>2.95 U/mL<br>3.16 U/mL<br>2.82 U/mL | 0 - 100 U/mL                                   |                         | [10] |
| Electrochemical (DPV)                         | TGA                                      | 1 U/mL                                           | 3 - 40 U/mL                                    | Serum                   | [11] |
| Electrochemical (Chronoamperometry)           | TGA                                      | 2 U/mL                                           | 3 - 100 U/mL                                   | Serum                   | [12] |
| Electrochemical (CV) + Optical (ECL)          | TGA                                      | 0.5 ng/mL                                        | 1.5 ng/mL - 10 µg/mL                           | Serum                   | [13] |
| Optical (SPR)                                 | TGA                                      | /                                                | 30-3000 nM                                     | Serum                   | [14] |
| Electrochemical (Amperometry) + IoT           | TGA                                      | 3.2 AU/mL (IgA)<br>1.4 AU/mL (IgG)               | 0 - 30 AU/mL                                   | Serum                   | [15] |
| <b>Multiple sclerosis</b>                     |                                          |                                                  |                                                |                         |      |
| Electrochemical (Amperometry)                 | Anti-MBP                                 | 0.016 ng/mL                                      | 0.05 - 50 ng/mL                                | Serum                   | [16] |
| Electrochemical (EIS)                         | Osteopontin                              | 0.98 fg/mL                                       | 0.05 - 10,000 pg/mL                            | Serum                   | [17] |
|                                               | Anti-IL 12 antibodies                    | 5 pg/mL                                          | 0 - 100 pg/mL                                  | Serum                   | [18] |
|                                               | anti-IL-12 antibodies                    | 3.5 pg/mL                                        | 0.1 - 500 pg/mL                                | Fetal Bovine Serum      | [19] |
|                                               | Anti-MBO                                 | 0.1495 ng/mL                                     | 0.4875 - 2500 ng/mL                            | Serum and CSF           | [20] |
|                                               | Anti-MBP                                 | 0.18 ng/mL                                       | /                                              | Serum                   | [21] |
| Electrochemical (DPV)                         | MBP, Tau                                 | 0.3 nM (MBP) 0.15 nM (Tau proteins)              | 58 - 227 nM (MBP), 0.5 - 15.1 nM (Tau protein) | Blood sample and/or CSF | [22] |
| Fluorescence                                  | miR-145                                  | 0.016 nM                                         | 0.1 nM - 1.6 nM                                | Serum                   | [23] |

|                                     |                                            |                                                     |                                                                  |                    |      |
|-------------------------------------|--------------------------------------------|-----------------------------------------------------|------------------------------------------------------------------|--------------------|------|
| spectrophotometer                   |                                            |                                                     |                                                                  |                    |      |
| Electrochemical (OFET)              | MBP                                        | 1 ng/mL                                             | 1 - 500 ng/mL                                                    | /                  | [24] |
| Electrochemical (DPV)               | miR-155                                    | 10 aM                                               | 10 aM – 1 $\mu$ M                                                | Serum              | [25] |
|                                     | BDNF                                       | 9 pg/mL                                             | 10 - 40 pg/mL                                                    | Fetal bovine serum | [26] |
| Optical (Lateral flow)              | Osteopontin                                | 0.1 ng/mL                                           | 10 - 500 ng/mL                                                   | Serum              | [27] |
| <b>Rheumatoid arthritis</b>         |                                            |                                                     |                                                                  |                    |      |
| Optical (ECL)                       | Anti-CCP                                   | 0.2 pg/mL                                           | 0.001 - 15 ng/mL                                                 | Serum              | [28] |
| Electrochemical (CV)                | Anti-CCP                                   | 15 pg/mL                                            | 8 - 250 pg/mL                                                    | Serum              | [29] |
| Electrochemical (EIS)               | Anti-CCP                                   | 0.82 U/mL                                           | 1 - 800 U/mL                                                     | Serum              | [30] |
| Optical (SERS)                      | Anti-CCP                                   | 0.18 U/mL                                           | 0–25 U/mL                                                        | Serum              | [31] |
| Electrochemical (Amperometry)       | IL-6                                       | 0.42 pg/mL                                          | 0.97 - 250 pg/mL                                                 | Serum              | [32] |
| Optical (Colorimetry)               | IgM-RF                                     | 4.15 IU/mL                                          | /                                                                | Serum              | [33] |
| Electrochemical (EIS)               | IgM-RF                                     | 0.22 IU/mL                                          | 1 - 200 IU/mL                                                    | Serum              | [34] |
| Electrochemical (amperometry)       | IgM-RF + Anti-CCP                          | 0.8 IU/mL (RF)<br>2.5 IU/mL (CCPA)                  | /                                                                | Serum              | [35] |
| Electrochemical (SWV)               | Anti-CCP                                   | 0.16 IU/mL (in PBS)<br>0.22 IU/mL (in human serum)  | 0.25 – 1500 IU/mL                                                | Serum              | [36] |
| Electrochemical (SWV+CV)            | Anti-CCP                                   | /                                                   | 0.125 - 2000 pg/mL                                               | Serum              | [37] |
| Electrochemical (EIS)               | IL-6                                       | 0.33 pg/mL                                          | 1 pg/mL - 15 mg/mL                                               | Serum              | [38] |
| Electrochemical (DPV)               | TNF- $\alpha$                              | 0.52 pg/mL                                          | 1 - 100 pg/mL                                                    | Serum              | [39] |
| Electrochemical (EIS)               | TNF- $\alpha$                              | 0.67 pg/mL (in PBS)<br>0.78 pg/mL (in human serum)  | 1 - 1000 pg/mL                                                   | Serum              | [40] |
| Electrochemical (EIS)               | TNF- $\alpha$                              | 60 pg/mL                                            | 500 pg/mL - 100 ng/mL                                            | Serum              | [41] |
| <b>Lupus erythematosus systemic</b> |                                            |                                                     |                                                                  |                    |      |
| Electrochemical (Amperometry)       | BAFF and APRIL                             | 0.33 pg/mL (BAFF)<br>16.4 pg/mL (APRIL)             | 1.1 - 100 pg/mL (BAFF)<br>0.05 - 20 ng/mL (APRIL)                | Serum              | [42] |
| Electrochemical (Amperometry)       | BAFF and APRIL                             | 0.08 ng/mL (BAFF)<br>0.06 ng/mL (APRIL)             | 0.24 - 120 ng/mL (BAFF)<br>0.19 - 25 ng/mL (APRIL)               | Serum              | [43] |
| Piezoelectric (QCM)                 | Anti-TRIM21 and anti-TROVE2 autoantibodies | 0.01 U/mL (anti-TRIM21)<br>0.005 U/mL (anti-TROVE2) | 0.32 - 7.17 U/mL (anti-TRIM21)<br>0.07 - 1.46 U/mL (anti-TROVE2) | Serum              | [44] |
| Electrochemical (Amperometry)       | anti-dsDNA                                 | 8 $\mu$ g/mL                                        | /                                                                | Serum              | [45] |

**Abbreviations:** TGA: transglutaminase-antibody; DGPA: antibody against deamidated gliadin peptides; AGA: anti-gliadin antibody; QCM: quartz crystal microbalance; IgA: immunoglobulin A; IgG: immunoglobulin G; tTG: tissue transglutaminase; IoT:

|                                                                                                                                                                                   |    |
|-----------------------------------------------------------------------------------------------------------------------------------------------------------------------------------|----|
| Internet of things; <b>Anti-MBP</b> : autoantibodies against myelin basic protein; <b>IL</b> : interleukin; <b>EIS</b> : Electrochemical impedance                                | 20 |
| spectrometry; <b>CSF</b> : cerebrospinal fluid; <b>miR</b> : micro-RNA; <b>BDNF</b> : brain-derived neurotrophic factor; <b>Anti-CCP</b> : Anti-cyclic                            | 21 |
| citrullinated peptide antibody; <b>ECL</b> : electrochemiluminescence; <b>RF</b> : Rheumatoid factor; <b>TNF-<math>\alpha</math></b> : tumor necrosis factor alpha; <b>BAFF</b> : | 22 |
| B-cell activation factor; <b>APRIL</b> : a proliferation-induced ligand; <b>Anti-dsDNA</b> : Anti-double stranded DNA; <b>CV</b> : cyclic voltammetry;                            | 23 |
| <b>LSV</b> : linear sweep voltammetry; <b>OFET</b> : Organic Field Effect Transistor; <b>DPV</b> : differential pulse voltammetry; <b>SWV</b> : Square wave                       | 24 |
| voltammetry; <b>SPR</b> : Surface plasmon resonance; <b>SERS</b> : surface-enhanced Raman scattering                                                                              | 25 |
|                                                                                                                                                                                   | 26 |

## References

1. Habtamu, H.B., et al., *Electrochemical Immunosensor Based on Nanoelectrode Ensembles for the Serological Analysis of IgG-type Tissue Transglutaminase*. *Sensors*, 2019. **19**(5): p. 1233.
2. Rosales-Rivera, L.C., et al., *Disulfide-modified antigen for detection of celiac disease-associated anti-tissue transglutaminase autoantibodies*. *Analytical and Bioanalytical Chemistry*, 2017. **409**(15): p. 3799-3806.
3. Puiu, M., et al., *A modular electrochemical peptide-based sensor for antibody detection*. *Chemical Communications*, 2014. **50**(64): p. 8962-8965.
4. Longo, S., et al., *Nanoelectrode ensemble immunosensor platform for the anodic detection of anti-tissue transglutaminase isotype IgA*. *Journal of Electroanalytical Chemistry*, 2022. **906**: p. 115984.
5. González-López, A., M.C. Blanco-López, and M.T. Fernández-Abedul, *Micropipette tip-based immunoassay with electrochemical detection of antitissue transglutaminase to diagnose celiac disease using staples and a paper-based platform*. *ACS sensors*, 2019. **4**(10): p. 2679-2687.
6. Martín-Yerga, D. and A. Costa-García, *Towards a blocking-free electrochemical immunosensing strategy for anti-transglutaminase antibodies using screen-printed electrodes*. *Bioelectrochemistry*, 2015. **105**: p. 88-94.
7. Rosales-Rivera, L., et al., *Electrochemical immunosensor detection of antigliadin antibodies from real human serum*. *Biosensors and Bioelectronics*, 2011. **26**(11): p. 4471-4476.
8. Wajs, E., N. Fernández, and A. Frago, *Supramolecular biosensors based on electropolymerised pyrrole-cyclodextrin modified surfaces for antibody detection*. *Analyst*, 2016. **141**(11): p. 3274-3279.
9. Manfredi, A., et al., *Piezoelectric immunosensor based on antibody recognition of immobilized open-tissue transglutaminase: An innovative perspective on diagnostic devices for celiac disease*. *Sensors and Actuators B: Chemical*, 2014. **201**: p. 300-307.
10. Neves, M.M.P.S., et al., *Multiplexed electrochemical immunosensor for detection of celiac disease serological markers*. *Sensors and Actuators B: Chemical*, 2013. **187**: p. 33-39.
11. Martín-Yerga, D., et al., *Enhanced detection of quantum dots by the magnetohydrodynamic effect for electrochemical biosensing*. *Analyst*, 2017. **142**(9): p. 1591-1600.
12. Nanni, P.I., et al., *Staple-Based Paper Electrochemical Platform for Celiac Disease Diagnosis*. *ChemElectroChem*, 2018. **5**(24): p. 4036-4045.
13. Habtamu, H.B., et al., *A sensitive electrochemiluminescence immunosensor for celiac disease diagnosis based on nanoelectrode ensembles*. *Analytical chemistry*, 2015. **87**(24): p. 12080-12087.
14. Cennamo, N., et al., *An innovative plastic optical fiber-based biosensor for new bio/applications. The case of celiac disease*. *Sensors and Actuators B: Chemical*, 2013. **176**: p. 1008-1014.
15. Giannetto, M., et al., *An integrated IoT-Wi-Fi board for remote data acquisition and sharing from innovative immunosensors. Case of study: Diagnosis of celiac disease*. *Sensors and Actuators B: Chemical*, 2018. **273**: p. 1395-1403.
16. Guerrero, S., et al., *Monitoring autoimmune diseases by bioelectrochemical detection of autoantibodies. Application to the determination of anti-myelin basic protein autoantibodies in serum of multiple sclerosis patients*. *Talanta*, 2022. **243**: p. 123304.
17. Zhou, S., et al., *Ti3C2Tx MXene and polyoxometalate nanohybrid embedded with polypyrrole: Ultra-sensitive platform for the detection of osteopontin*. *Applied Surface Science*, 2019. **498**: p. 143889.

|     |                                                                                                                                                                                                                                                                                   |                   |
|-----|-----------------------------------------------------------------------------------------------------------------------------------------------------------------------------------------------------------------------------------------------------------------------------------|-------------------|
| 18. | La Belle, J.T., et al., <i>A cytokine immunosensor for multiple sclerosis detection based upon label-free electrochemical impedance spectroscopy</i> . Biosensors and Bioelectronics, 2007. <b>23</b> (3): p. 428-431.                                                            | 72<br>73<br>74    |
| 19. | Bhavsar, K., et al., <i>A cytokine immunosensor for Multiple Sclerosis detection based upon label-free electrochemical impedance spectroscopy using electroplated printed circuit board electrodes</i> . Biosensors and Bioelectronics, 2009. <b>25</b> (2): p. 506-509.          | 75<br>76<br>77    |
| 20. | Derkus, B., et al., <i>Myelin basic protein immunosensor for multiple sclerosis detection based upon label-free electrochemical impedance spectroscopy</i> . Biosensors and Bioelectronics, 2013. <b>46</b> : p. 53-60.                                                           | 78<br>79<br>80    |
| 21. | Derkus, B., et al., <i>Alginate and alginate-titanium dioxide nanocomposite as electrode materials for anti-myelin basic protein immunosensing</i> . Sensors and Actuators B: Chemical, 2014. <b>192</b> : p. 294-302.                                                            | 81<br>82<br>83    |
| 22. | Derkus, B., et al., <i>Simultaneous quantification of Myelin Basic Protein and Tau proteins in cerebrospinal fluid and serum of Multiple Sclerosis patients using nanoimmunosensor</i> . Biosensors and Bioelectronics, 2017. <b>89</b> : p. 781-788.                             | 84<br>85<br>86    |
| 23. | Mansourian, N., M. Rahaie, and M. Hosseini, <i>A Nanobiosensor Based on Fluorescent DNA-Hosted Silver Nanocluster and HCR Amplification for Detection of MicroRNA Involved in Progression of Multiple Sclerosis</i> . Journal of Fluorescence, 2017. <b>27</b> (5): p. 1679-1685. | 87<br>88<br>89    |
| 24. | Song, J., et al., <i>Influence of Bioreceptor Layer Structure on Myelin Basic Protein Detection using Organic Field Effect Transistor-Based Biosensors</i> . Advanced Functional Materials, 2018. <b>28</b> (37): p. 1802605.                                                     | 90<br>91<br>92    |
| 25. | Shariati, S., A. Ghaffarinejad, and E. Omidinia, <i>Early detection of multiple sclerosis (MS) as a neurodegenerative disease using electrochemical nano-aptasensor</i> . Microchemical Journal, 2022. <b>178</b> : p. 107358.                                                    | 93<br>94<br>95    |
| 26. | Ayankojo, A.G., et al., <i>Electrochemical sensor based on molecularly imprinted polymer for rapid quantitative detection of brain-derived neurotrophic factor</i> . Sensors and Actuators B: Chemical, 2023. <b>397</b> : p. 134656.                                             | 96<br>97<br>98    |
| 27. | Mukama, O., et al., <i>A highly sensitive and specific lateral flow aptasensor for the detection of human osteopontin</i> . Talanta, 2020. <b>210</b> : p. 120624.                                                                                                                | 99<br>100         |
| 28. | Zhao, Y., et al., <i>Label-free ECL immunosensor for the early diagnosis of rheumatoid arthritis based on asymmetric heterogeneous polyaniline-gold nanomaterial</i> . Sensors and Actuators B: Chemical, 2018. <b>257</b> : p. 354-361.                                          | 101<br>102<br>103 |
| 29. | Zhou, B., et al., <i>Immunosensing the rheumatoid arthritis biomarker through bifunctional aldehyde-amine linkers on an iron oxide nanoparticle seeded voltammetry sensor</i> . Nanomaterials and Nanotechnology, 2022. <b>12</b> : p. 18479804221085103.                         | 104<br>105<br>106 |
| 30. | Chinnadayala, S.R. and S. Cho, <i>Electrochemical immunosensor for the early detection of rheumatoid arthritis biomarker: Anti-cyclic citrullinated peptide antibody in human serum based on avidin-biotin system</i> . Sensors, 2020. <b>21</b> (1): p. 124.                     | 107<br>108<br>109 |
| 31. | Chon, H., et al. <i>Highly sensitive immunoassay of anti-cyclic citrullinated peptide marker using surface-enhanced Raman scattering detection</i> . in <i>International Conference on Nano-Bio Sensing, Imaging, and Spectroscopy 2015</i> . 2015. SPIE.                         | 110<br>111<br>112 |
| 32. | Zhang, C., et al., <i>Microfluidic electrochemical magnetoimmunosensor for ultrasensitive detection of interleukin-6 based on hybrid of AuNPs and graphene</i> . Talanta, 2022. <b>240</b> : p. 123173.                                                                           | 113<br>114        |
| 33. | Veigas, B., et al., <i>Antibody modified gold nanoparticles for fast colorimetric screening of rheumatoid arthritis</i> . Analyst, 2019. <b>144</b> (11): p. 3613-3619.                                                                                                           | 115<br>116        |
| 34. | Chinnadayala, S.R., et al., <i>Label-free electrochemical impedimetric immunosensor for sensitive detection of IgM rheumatoid factor in human serum</i> . Biosensors and Bioelectronics, 2019. <b>143</b> : p. 111642.                                                            | 117<br>118<br>119 |

|     |                                                                                                                                                                                                                                                                                                                                                                                           |                          |
|-----|-------------------------------------------------------------------------------------------------------------------------------------------------------------------------------------------------------------------------------------------------------------------------------------------------------------------------------------------------------------------------------------------|--------------------------|
| 35. | Guerrero, S., et al., <i>Electrochemical biosensor for the simultaneous determination of rheumatoid factor and anti-cyclic citrullinated peptide antibodies in human serum</i> . Analyst, 2020. <b>145</b> (13): p. 4680-4687.                                                                                                                                                            | 120<br>121<br>122        |
| 36. | Selvam, S.P., S.R. Chinnadayala, and S. Cho, <i>Electrochemical nanobiosensor for early detection of rheumatoid arthritis biomarker: Anti-cyclic citrullinated peptide antibodies based on polyaniline (PANI)/MoS<sub>2</sub>-modified screen-printed electrode with PANI-Au nanomatrix-based signal amplification</i> . Sensors and Actuators B: Chemical, 2021. <b>333</b> : p. 129570. | 123<br>124<br>125<br>126 |
| 37. | Ma, J., et al., <i>Label-free Electrochemical Immunosensor for Sensitive Detection of Rheumatoid Arthritis Biomarker Anti-CCP-ab</i> . Electroanalysis, 2022. <b>34</b> (4): p. 761-771.                                                                                                                                                                                                  | 127<br>128               |
| 38. | Tertiş, M., et al., <i>Label-free electrochemical aptasensor based on gold and polypyrrole nanoparticles for interleukin 6 detection</i> . Electrochimica Acta, 2017. <b>258</b> : p. 1208-1218.                                                                                                                                                                                          | 129<br>130               |
| 39. | Hosseini Ghalehno, M., M. Mirzaei, and M. Torkzadeh-Mahani, <i>Electrochemical aptasensor for tumor necrosis factor <math>\alpha</math> using aptamer-antibody sandwich structure and cobalt hexacyanoferrate for signal amplification</i> . Journal of the Iranian Chemical Society, 2019. <b>16</b> (8): p. 1783-1791.                                                                  | 131<br>132<br>133<br>134 |
| 40. | Yagati, A.K., M.-H. Lee, and J. Min, <i>Electrochemical immunosensor for highly sensitive and quantitative detection of tumor necrosis factor-<math>\alpha</math> in human serum</i> . Bioelectrochemistry, 2018. <b>122</b> : p. 93-102.                                                                                                                                                 | 135<br>136<br>137        |
| 41. | Arya, S.K. and P. Estrela, <i>Electrochemical immunosensor for tumor necrosis factor-alpha detection in undiluted serum</i> . Methods, 2017. <b>116</b> : p. 125-131.                                                                                                                                                                                                                     | 138<br>139               |
| 42. | Arévalo, B., et al., <i>Simultaneous electrochemical immunosensing of relevant cytokines to diagnose and track cancer and autoimmune diseases</i> . Bioelectrochemistry, 2022. <b>146</b> : p. 108157.                                                                                                                                                                                    | 140<br>141               |
| 43. | Arévalo, B., et al., <i>Binary MoS<sub>2</sub> nanostructures as nanocarriers for amplification in multiplexed electrochemical immunosensing: Simultaneous determination of B cell activation factor and proliferation-induced signal immunity-related cytokines</i> . Microchimica Acta, 2022. <b>189</b> (4): p. 143.                                                                   | 142<br>143<br>144        |
| 44. | do Nascimento, N.M., et al., <i>Label-free piezoelectric biosensor for prognosis and diagnosis of Systemic Lupus Erythematosus</i> . Biosensors and Bioelectronics, 2017. <b>90</b> : p. 166-173.                                                                                                                                                                                         | 145<br>146               |
| 45. | Fagúndez, P., et al., <i>An electrochemical biosensor for rapid detection of anti-dsDNA antibodies in absolute scale</i> . Analyst, 2018. <b>143</b> (16): p. 3874-3882.                                                                                                                                                                                                                  | 147<br>148               |
